# Supplementary material
Source: PubMed Central journal article supplement (PMC3081911)
Supplement: NIHMS274709-supplement-01.pdf [file NIHMS274709-supplement-01.pdf]

## APPENDIX 1.

The **Childhood Cancer Survivor Study (CCSS)** is a collaborative, multi-institutional project, funded as a resource by the National Cancer Institute, of individuals who survived five or more years after diagnosis of childhood cancer. **CCSS** is a retrospectively ascertained cohort of 20,346 childhood cancer survivors diagnosed before age 21 between 1970 and 1986 and approximately 4,000 siblings of survivors, who serve as a control group. The cohort was assembled through the efforts of 26 participating clinical research centers in the United States and Canada. The study is currently funded by a U24 resource grant (NCI grant # U24 CA55727) awarded to St. Jude Children's Research Hospital. Currently, we are in the process of expanding the cohort to include an additional 14,000 childhood cancer survivors diagnosed before age 21 between 1987 and 1999. For information on how to access and utilize the CCSS resource, visit [www.ccss.stjude.org](http://www.ccss.stjude.org)

CCSS Institutions and Investigators

|                                                                  |                                                                                                                                                                                            |
|------------------------------------------------------------------|--------------------------------------------------------------------------------------------------------------------------------------------------------------------------------------------|
| St. Jude Children's Research Hospital, Memphis, TN               | Leslie L. Robison, PhD <sup>**</sup> , Melissa Hudson, MD <sup>**</sup><br>Greg T. Armstrong, MD, MSCE <sup>‡</sup> , Daniel M. Green, MD <sup>‡</sup><br>Kevin R. Krull, PhD <sup>‡</sup> |
| Children's Healthcare of Atlanta/Emory University<br>Atlanta, GA | Lillian Meacham, MD <sup>*</sup> , Ann Mertens, PhD <sup>‡</sup>                                                                                                                           |
| Children's Hospitals and Clinics of Minnesota<br>St. Paul, MN    | Joanna Perkins, MD, MS <sup>*</sup>                                                                                                                                                        |
| Seattle Children's Hospital, Seattle, WA                         | Scott Baker, MD <sup>*</sup> , Eric Chow, MD, MPH <sup>‡</sup>                                                                                                                             |
| Children's Hospital, Denver, CO                                  | Brian Greffe, MD <sup>*</sup>                                                                                                                                                              |
| Children's Hospital Los Angeles, CA                              | Kathy Ruccione, RN, MPH <sup>*</sup>                                                                                                                                                       |
| Children's Hospital, Oklahoma City, OK                           | John Mulvihill, MD <sup>**</sup>                                                                                                                                                           |
| Children's Hospital of Orange County, Orange, CA                 | Leonard Sender, MD <sup>*</sup>                                                                                                                                                            |
| Children's Hospital of Philadelphia, Philadelphia, PA            | Jill Ginsberg, MD <sup>*</sup> , Anna Meadows, MD <sup>‡</sup>                                                                                                                             |
| Children's Hospital of Pittsburgh, Pittsburgh, PA                | Jean Tersak, MD <sup>*</sup>                                                                                                                                                               |
| Children's National Medical Center, Washington, DC               | Gregory Reaman, MD <sup>*</sup> , Roger Packer, MD <sup>‡</sup>                                                                                                                            |
| Cincinnati Children's Hospital Medical Center<br>Cincinnati, OH  | Stella Davies, MD, PhD <sup>**</sup>                                                                                                                                                       |
| City of Hope Medical Center, Los Angeles, CA                     | Smita Bhatia, MD <sup>**</sup>                                                                                                                                                             |
| Cook Children's Medical Center, Ft. Worth, TX                    | Paul Bowman, MD, MPH <sup>*</sup>                                                                                                                                                          |
| Dana-Farber Cancer Institute/Children's Hospital<br>Boston, MA   | Lisa Diller, MD <sup>**</sup>                                                                                                                                                              |
| Fred Hutchinson Cancer Research Center, Seattle, WA              | Wendy Leisenring, ScD <sup>**</sup>                                                                                                                                                        |
| Hospital for Sick Children, Toronto, ON                          | Mark Greenberg, MBChB <sup>*</sup> , Paul C. Nathan, MD, MSc <sup>**</sup>                                                                                                                 |
| International Epidemiology Institute, Rockville, MD              | John Boice, ScD <sup>**</sup>                                                                                                                                                              |
| Mayo Clinic, Rochester, MN                                       | Vilmarie Rodriguez, MD <sup>**</sup>                                                                                                                                                       |
| Memorial Sloan-Kettering Cancer Center, New York, NY             | Charles Sklar, MD <sup>**</sup> , Kevin Oeffinger, MD <sup>‡</sup>                                                                                                                         |
| Miller Children's Hospital, Long Beach, CA                       | Jerry Finklestein, MD <sup>*</sup>                                                                                                                                                         |
| National Cancer Institute, Bethesda, MD                          | Roy Wu, PhD <sup>‡</sup> , Nita Seibel, MD <sup>‡</sup> ,<br>Preetha Rajaraman, PhD <sup>‡</sup> , Peter Inskip, ScD <sup>‡</sup><br>Julia Rowland, PhD <sup>‡</sup>                       |
| Nationwide Children's Hospital, Columbus, Ohio                   | Amanda Termuhlen, MD <sup>*</sup> , Sue Hammond, MD <sup>‡</sup>                                                                                                                           |
| Northwestern University, Chicago, IL                             | Kimberley Dilley, MD, MPH <sup>*</sup>                                                                                                                                                     |
| Riley Hospital for Children, Indianapolis, IN                    | Terry A. Vik, MD <sup>*</sup>                                                                                                                                                              |
| Roswell Park Cancer Institute, Buffalo, NY                       | Denise Rokitka, MD, MPH <sup>*</sup>                                                                                                                                                       |
| St. Louis Children's Hospital, St. Louis, MO                     | Robert Hayashi, MD <sup>*</sup>                                                                                                                                                            |
| Stanford University School of Medicine, Stanford, CA             | Neyssa Marina, MD <sup>*</sup> , Sarah S. Donaldson, MD <sup>‡</sup>                                                                                                                       |
| Texas Children's Hospital, Houston, TX                           | Zoann Dreyer, MD <sup>*</sup>                                                                                                                                                              |
| University of Alabama, Birmingham, AL                            | Kimberly Whelan, MD, MSPH <sup>*</sup>                                                                                                                                                     |
| University of Alberta, Edmonton, AB                              | Yutaka Yasui, PhD <sup>**</sup>                                                                                                                                                            |
| University of California-Los Angeles, CA                         | Jacqueline Casillas, MD, MSHS <sup>*</sup> , Lonnie Zeltzer, MD <sup>‡</sup>                                                                                                               |
| University of California-San Francisco, CA                       | Robert Goldsby, MD <sup>*</sup>                                                                                                                                                            |
| University of Chicago, Chicago, IL                               | Tara Henderson, MD, MPH <sup>*</sup>                                                                                                                                                       |
| University of Michigan, Ann Arbor, MI                            | Raymond Hutchinson, MD <sup>*</sup>                                                                                                                                                        |
| University of Minnesota, Minneapolis, MN                         | Daniel Mulrooney, MD, MS <sup>*</sup> , Joseph Neglia, MD, MPH <sup>‡</sup>                                                                                                                |
| University of Southern California, Los Angeles, CA               | Dennis Deapen, DrPH <sup>**</sup>                                                                                                                                                          |
| UT-Southwestern Medical Center, Dallas, TX                       | Daniel C. Bowers, MD <sup>*</sup>                                                                                                                                                          |
| U.T.M.D. Anderson Cancer Center, Houston, TX                     | Louise Strong, MD <sup>**</sup> , Marilyn Stovall, MPH, PhD <sup>‡</sup>                                                                                                                   |

\* Institutional Principal Investigator

# Project Principal Investigator (U24 CA55727)

‡ Member CCSS Steering Committee
